# Supplementary material for: Optimized Expression and Characterization of a Novel Fully Human Bispecific Single-Chain Diabody Targeting Vascular Endothelial Growth Factor165 and Programmed Death-1 in Pichia pastoris and Evaluation of Antitumor Activity In Vivo
Source: MDPI journal article supplement (doi:10.3390/ijms19102900), 2018-09-25
Supplement: s1 [file s1]

# Optimized Expression and Characterization of a Novel Fully Human Bispecific Single-Chain Diabody Targeting Vascular Endothelial Growth Factor165 and Programmed Death-1 in *Pichia pastoris* and Evaluation of Antitumor Activity In Vivo

Chenghao Xiong, Yingqing Mao, Tao Wu, Nannan Kang, Mingjun Zhao, Rongrong Di, Xiaoping Li, Xuemei Ji and Yu Liu

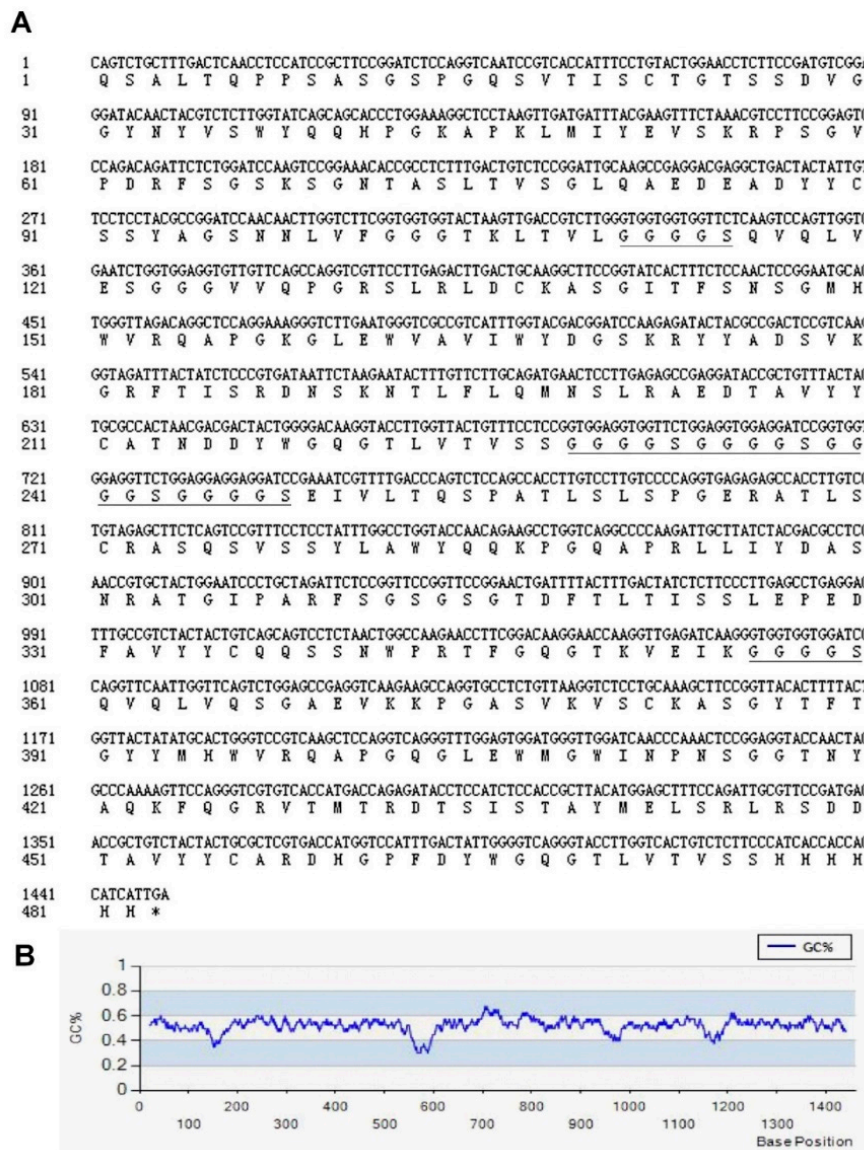

**Figure S1.** Optimization of recombinant BsDb gene fragment. (A) The amino acid sequence and optimized nucleotide sequence of this BsDb. Underline: (G4S)<sub>n</sub> linker, \*: stop codon. (B) G+C content analysis of this BsDb gene fragment after optimization. GC% was approximately 52.09%.

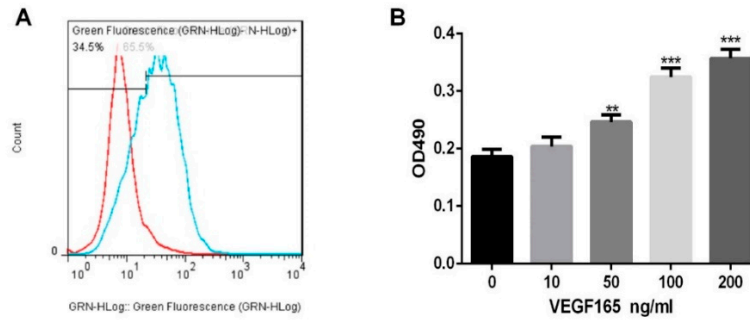

**Figure S2.** Identification of primary HUVECs. (A) VEGFR2 expression on primary HUVECs was detected using mouse anti-human VEGFR2 antibody (Sino Biological Inc., Beijing, China) and FITC-conjugated Secondary antibody (CW biotech, Beijing, China) by FCM. FCM analysis indicated VEGFR2 expressed on primary HUVECs with high levels. (B) VEGF165-induced proliferation of primary HUVECs was detected by MTT assay. The experiment was done in triplicate, and the mean values  $\pm$  SD were presented. \* $p < 0.05$ , \*\* $p < 0.01$ , two-tailed students t-test, versus control group.

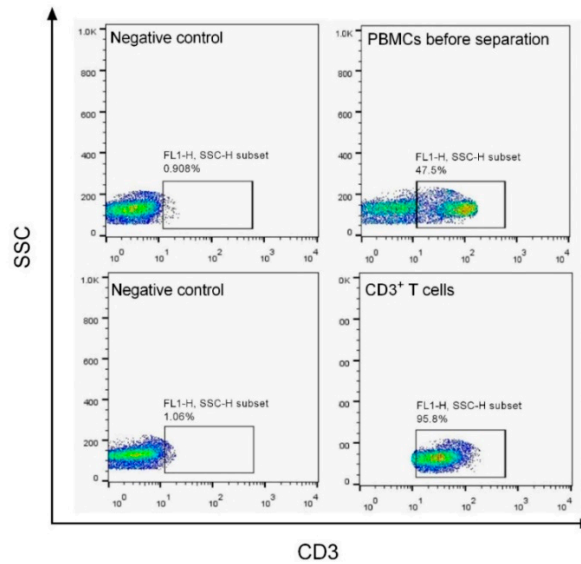

**Figure S3.** Analysis of T cells isolated from PBMCs. T cells were isolated from PBMCs using CD3 microbeads (Miltenyi, Cologne, Germany) by MACS. Purity of T cells was analyzed by FCM using a FITC-conjugated CD3 antibody (Sino Biological Inc., Beijing, China). Purity of T cells before and after separation were approximately 47.5% and 95.8%, respectively.

**Table S1.** Primers for PCR amplification of recombinant BsDb and colony PCR.

|          |                                    |
|----------|------------------------------------|
| primer 1 | 5'-GGAATTCAGTCTGCTTTGACTCAA-3'     |
| primer 2 | 5'-GCTCTAGATCAAT GATGGTGGTGGTGA-3' |
| AOX1-F   | 5'-GACTGGTTCCAATTGACAAGC-3'        |
| AOX1-R   | 5'-GCAAATGGCATTCTGACATCC-3'        |

Underline: restriction sites.
